# Supplementary material for: Influence of the Drug Position on Bioactivity in Angiopep-2—Daunomycin Conjugates
Source: MDPI journal article supplement (doi:10.3390/ijms24043106), 2023-02-04
Supplement: s1 [file s1]

# Influence of the Drug Position on Bioactivity in Angiopep-2 – Daunomycin Conjugates

Lilla Pethő<sup>1</sup>, Rita Oláh-Szabó<sup>1,†</sup> and Gábor Mező<sup>1,2,\*</sup>

<sup>1</sup> ELKH-ELTE Research Group of Peptide Chemistry, 1117 Budapest, Hungary

<sup>2</sup> Institute of Chemistry, Faculty of Science, Eötvös Loránd University, 1117 Budapest, Hungary

\* Correspondence: gabor.mezo@ttk.elte.hu

† Present address: Department of Genetics, Cell- and Immunobiology, Faculty of Medicine, Semmelweis University, 1089 Budapest, Hungary.

## Table of contents

|                                                                               |    |
|-------------------------------------------------------------------------------|----|
| Analytical data of compounds <b>1-8</b>                                       | 2  |
| Analytical chromatograms and MS spectra of compounds <b>1-8</b>               | 3  |
| Total ion chromatograms of the lysosomal degradation of compounds <b>1-8</b>  | 7  |
| Detected fragments of the lysosomal degradation of compounds <b>1-8</b>       | 11 |
| Analytical data of compounds <b>9-11</b>                                      | 17 |
| Analytical chromatograms and MS spectra of compounds <b>9-11</b>              | 17 |
| Total ion chromatograms of the lysosomal degradation of compounds <b>9-11</b> | 19 |
| Detected fragments of the lysosomal degradation of compounds <b>9-11</b>      | 21 |

**Table S1.** Analytical data of the synthesized Angiopep-2 peptide and the daunomycin-Angiopep-2 conjugates

| Code | Compound                                         | $R_t$ / min <sup>a</sup> | $MW_{calc}$ / $MW_{meas}$ <sup>b</sup> |
|------|--------------------------------------------------|--------------------------|----------------------------------------|
| 1    | H-TFFYGGSRGKRNNFKTEEY-OH                         | 18.6                     | 2300.1 / 2300.2                        |
| 2    | H-TFFYGGSRGKRNNFK(Dau=Aoa)TEEY-OH                | 20.9                     | 2882.3 / 2882.3                        |
| 3    | Dau=Aoa-TFFYGGSRGKRNNFKTEEY-OH                   | 21.9                     | 2882.3 / 2882.3                        |
| 4    | H-TFFYGGSRGK(Dau=Aoa)RNNFKTEEY-OH                | 21.2                     | 2882.3 / 2882.3                        |
| 5    | Dau=Aoa-TFFYGGSRGKRNNFK(Dau=Aoa)TEEY-OH          | 21.8                     | 3464.5 / 3464.5                        |
| 6    | H-TFFYGGSRGK(Dau=Aoa)RNNFK(Dau=Aoa)TEEY-OH       | 20.6                     | 3464.5 / 3464.5                        |
| 7    | Dau=Aoa-TFFYGGSRGK(Dau=Aoa)RNNFKTEEY-OH          | 21.8                     | 3464.5 / 3464.5                        |
| 8    | Dau=Aoa-TFFYGGSRGK(Dau=Aoa)RNNFK(Dau=Aoa)TEEY-OH | 21.6                     | 4046.7 / 4046.6                        |

<sup>a</sup> Macherey-Nagel Nucleosil C18 column (5  $\mu$ m, 100 Å, 250  $\times$  4,6 mm); gradient: 0 min 2% B, 5 min 2% B, 30 min 90% B; eluent A: 0.1% TFA / distilled water, eluent B: 0.1% TFA / acetonitrile:distilled water (80:20, v/v); flow rate: 1 mL/min; detection: 214 nm.

<sup>b</sup> ESI-MS Bruker Daltonics Esquire 3000 Plus

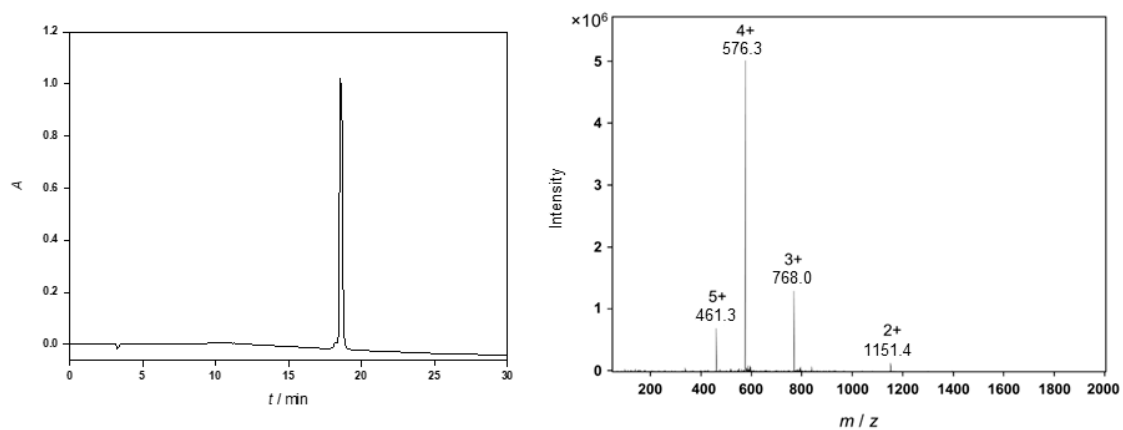

**Figure S1.** Analytical chromatogram and MS spectrum of Angiopep-2 (1)

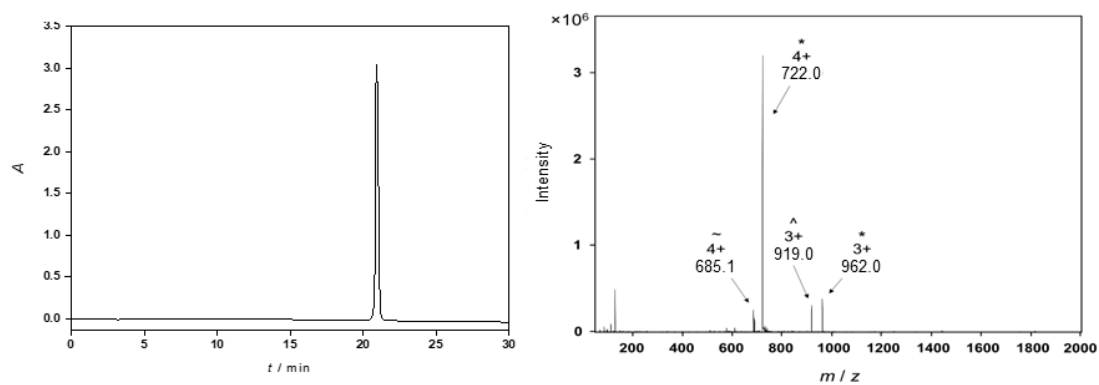

**Figure S2.** Analytical chromatogram and MS spectrum of H-TFFYGGSRGKRNNFK(Dau=Aoa)TEEY-OH (2). Peaks marked with - and ^ belong to the fragments resulting from the sugar loss of daunomycin occurring under general conditions of MS.

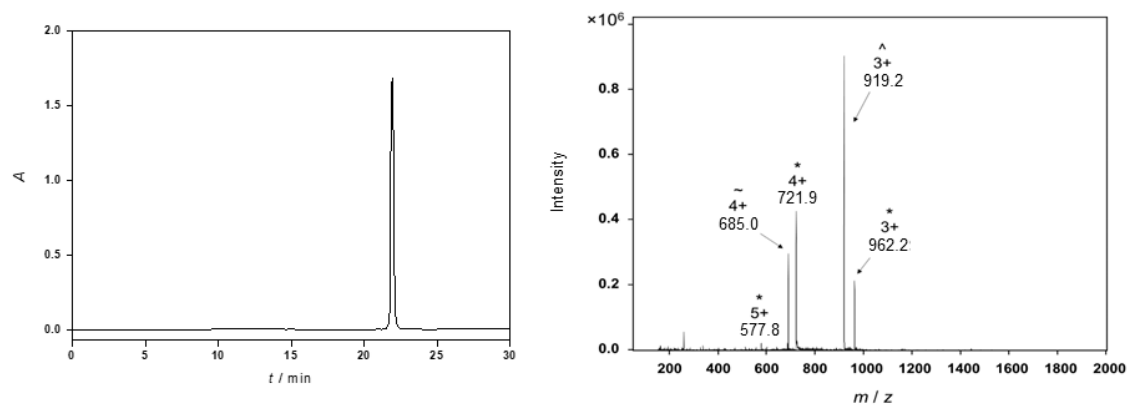

**Figure S3.** Analytical chromatogram and MS spectrum of Dau=Aoa-TFFYGGSRGKRNNFKTEEY-OH (3). Peaks marked with - and ^ belong to the fragments resulting from the sugar loss of daunomycin occurring under general conditions of MS.

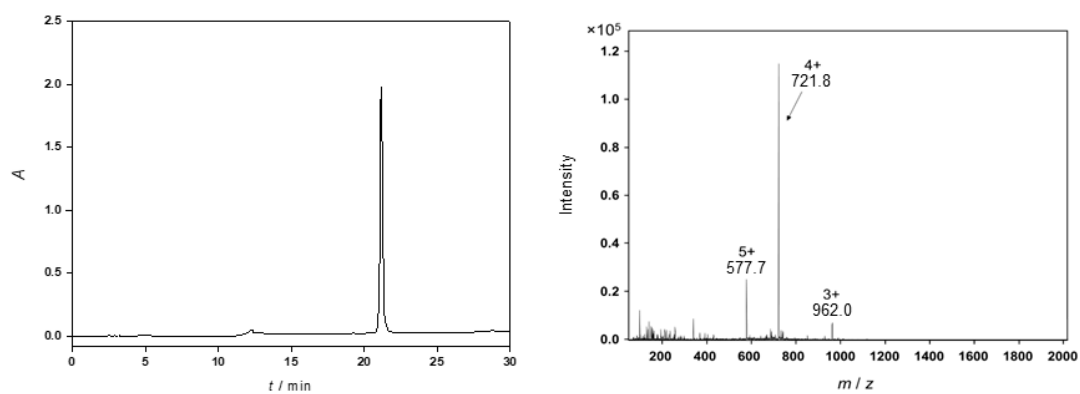

**Figure S4.** Analytical chromatogram and MS spectrum of H-TFFYGGSRGK(Dau=Aoa)RNNFKTEEY-OH (4)

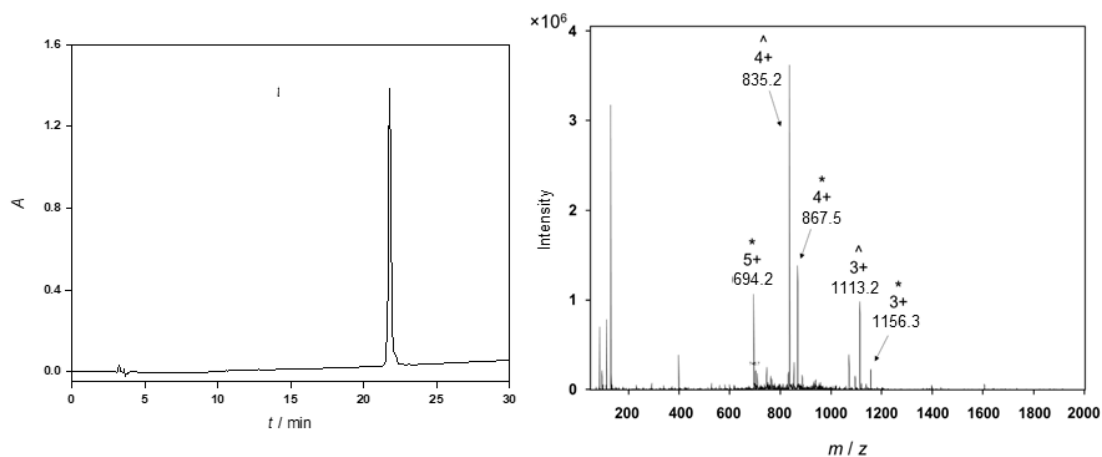

**Figure S5.** Analytical chromatogram and MS spectrum of Dau=Aoa-TFFYGGSRGKRNNFK(Dau=Aoa)TEEY-OH (**5**). Peaks marked with ^ belong to the fragments resulting from the sugar loss of daunomycin occurring under general conditions of MS.

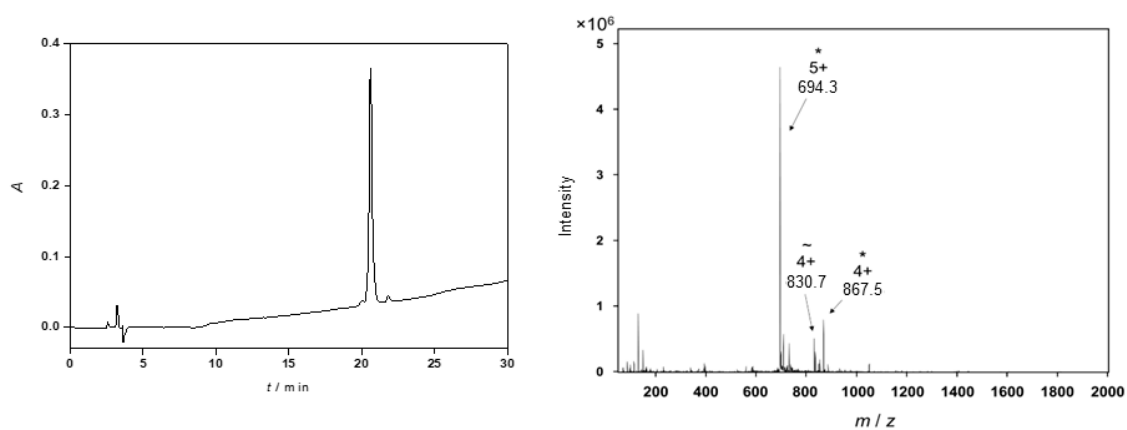

**Figure S6.** Analytical chromatogram and MS spectrum of H-TFFYGGSRG(Dau=Aoa)KRNNFK(Dau=Aoa)TEEY-OH (**6**). Peaks marked with ~ belong to the fragments resulting from the sugar loss of daunomycin occurring under general conditions of MS.

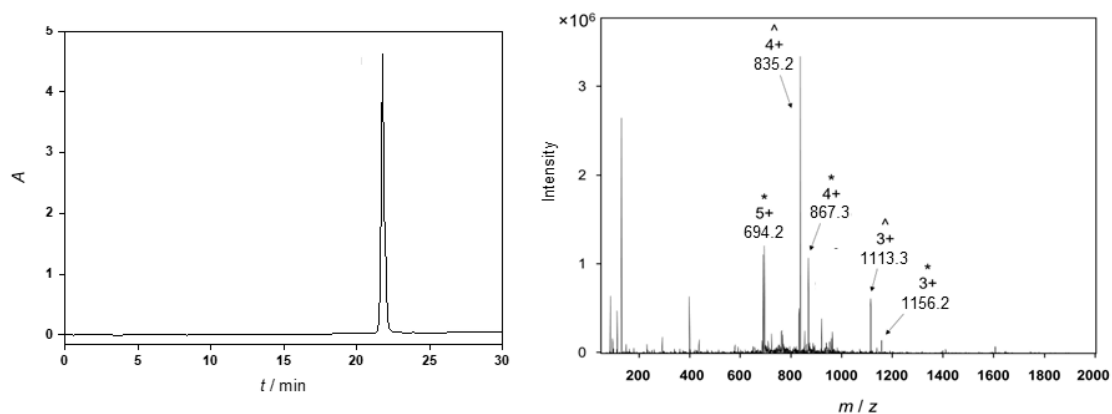

**Figure S7.** Analytical chromatogram and MS spectrum of Dau=Aoa-TFFYGGSRGK(Dau=Aoa)RNNFKTEEY-OH (7). Peaks marked with ^ belong to the fragments resulting from the sugar loss of daunomycin occurring under general conditions of MS.

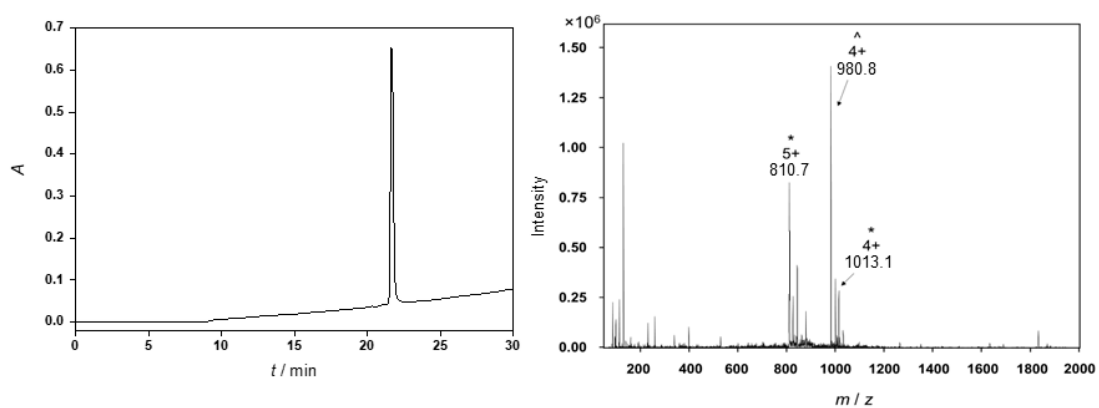

**Figure S8.** Analytical chromatogram and MS spectrum of Dau=Aoa-TFFYGGSRGK(Dau=Aoa)RNNFK(Dau=Aoa)TEEY-OH (8). Peaks marked with ^ belong to the fragments resulting from the sugar loss of daunomycin occurring under general conditions of MS.

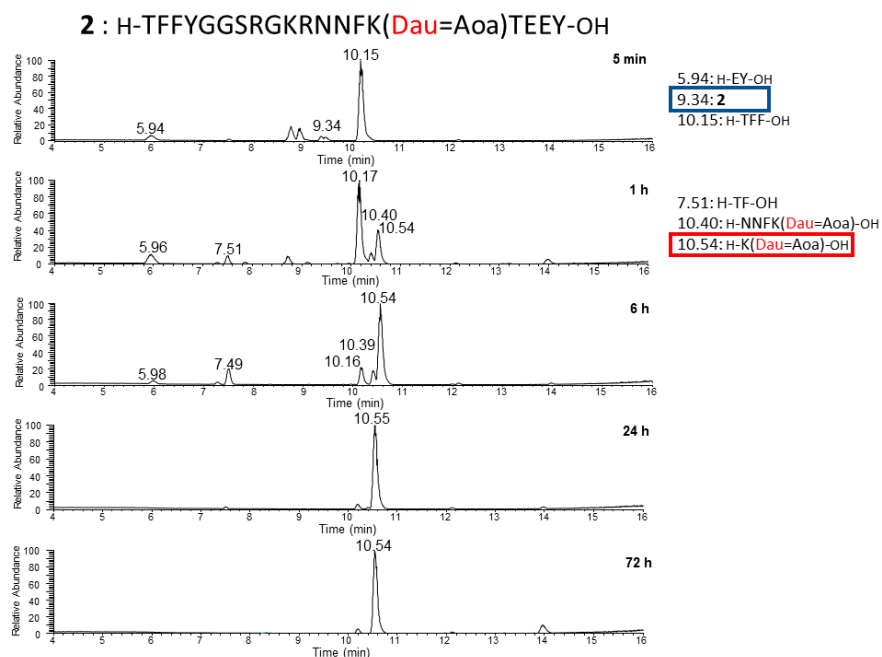

**Figure S9.** Detected total ion chromatograms showing the lysosomal degradation of conjugate **2**. (The blue box indicates the parent conjugate, while the red box marks the smallest drug containing metabolite.)

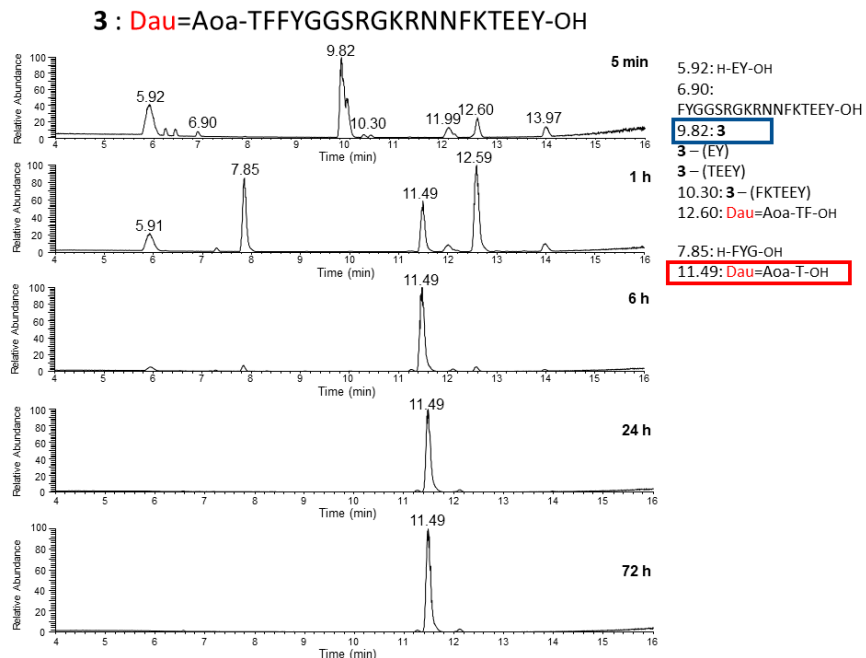

**Figure S10.** Detected total ion chromatograms showing the lysosomal degradation of conjugate **3**. (The blue box indicates the parent conjugate, while the red box marks the smallest drug containing metabolite.)

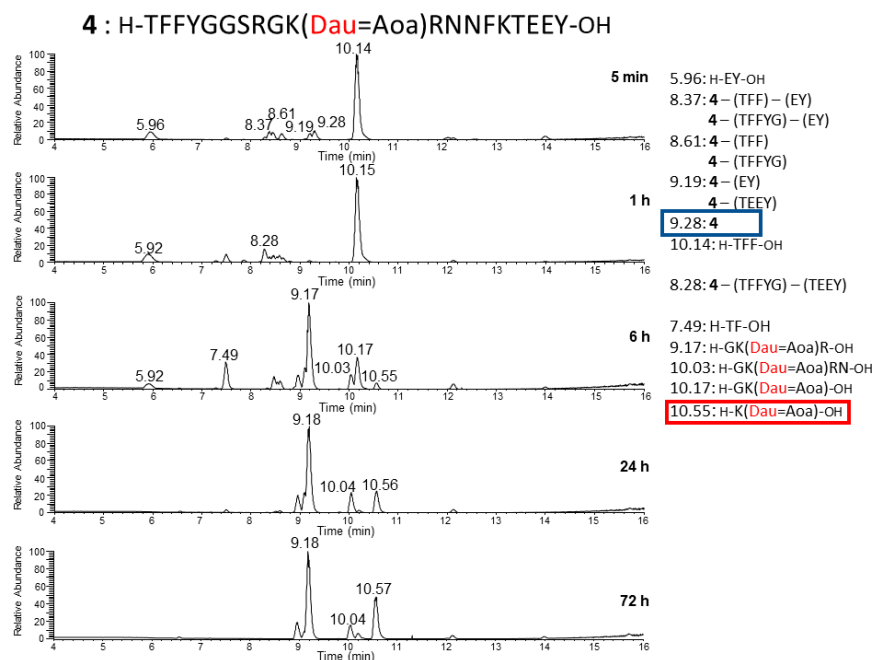

**Figure S11.** Detected total ion chromatograms showing the lysosomal degradation of conjugate 4. (The blue box indicates the parent conjugate, while the red box marks the smallest drug containing metabolite.)

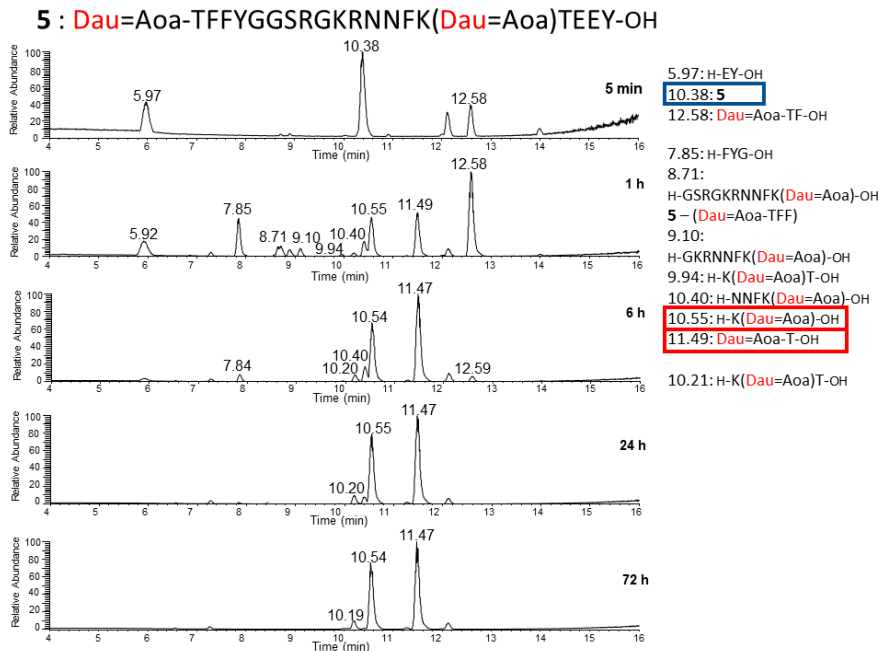

**Figure S12.** Detected total ion chromatograms showing the lysosomal degradation of conjugate 5. (The blue box indicates the parent conjugate, while the red boxes mark the smallest drug containing metabolites.)



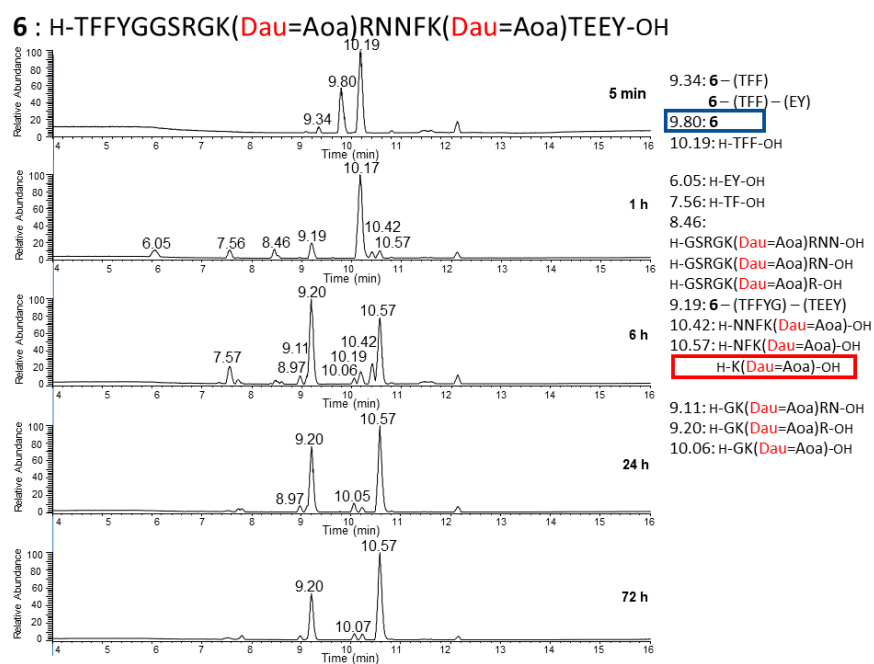

**Figure S13.** Detected total ion chromatograms showing the lysosomal degradation of conjugate **6**. (The blue box indicates the parent conjugate, while the red box marks the smallest drug containing metabolite.)

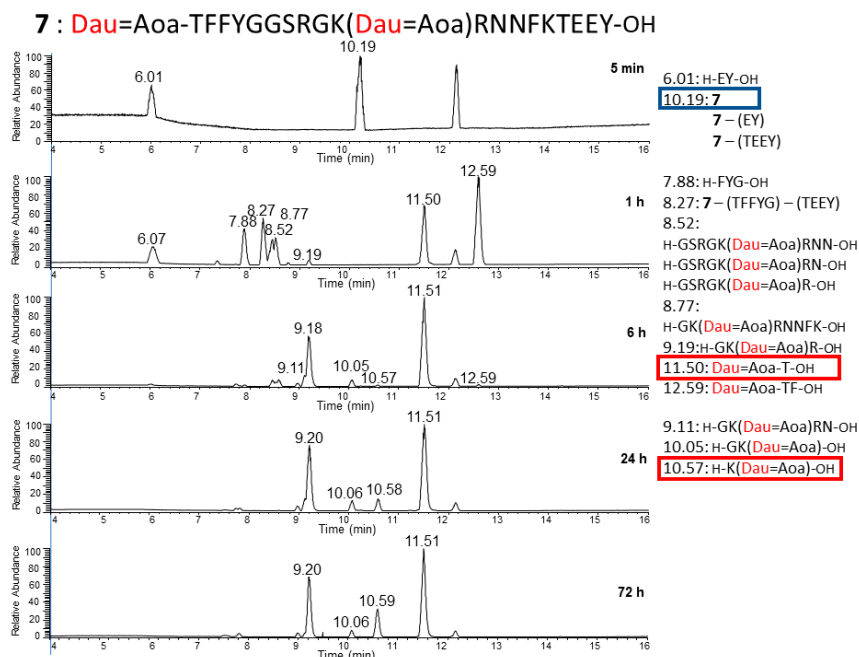

**Figure S14.** Detected total ion chromatograms showing the lysosomal degradation of conjugate 7. (The blue box indicates the parent conjugate, while the red boxes mark the smallest drug containing metabolites.)

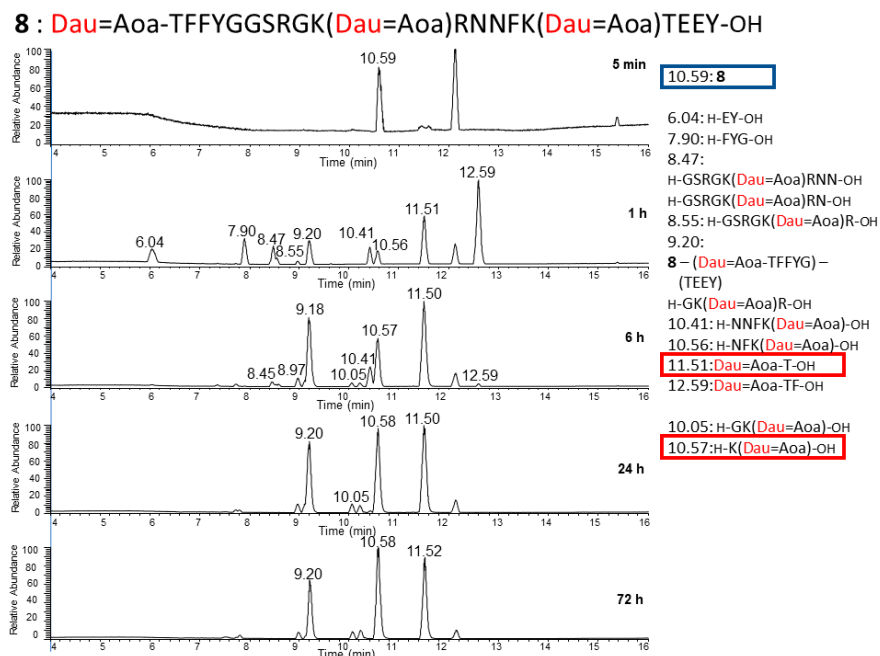

**Figure S15.** Detected total ion chromatograms showing the lysosomal degradation of conjugate 8. (The blue box indicates the parent conjugate, while the red boxes mark the smallest drug containing metabolites.)

**Table S2.** Detected fragments from the lysosomal degradation of conjugate 2.<sup>a</sup>

|    | Fragment                          | Chemical formula                                                  | MW <sub>calc</sub> | MW <sub>meas</sub> | Δ ppm |
|----|-----------------------------------|-------------------------------------------------------------------|--------------------|--------------------|-------|
| 1  | H-TFFYGGSRGKRNNFK(Dau=Aoa)TEEY-OH | C <sub>133</sub> H <sub>179</sub> N <sub>31</sub> O <sub>42</sub> | 2882.2824          | 2882.2761          | -2.19 |
| 2  | H-TFFYGGSRGKRNNFK(Dau=Aoa)TE-OH   | C <sub>119</sub> H <sub>163</sub> N <sub>29</sub> O <sub>37</sub> | 2590.1765          | 2590.1682          | -3.20 |
| 3  | H-YGGSRGKRNNFK(Dau=Aoa)TEEY-OH    | C <sub>111</sub> H <sub>154</sub> N <sub>28</sub> O <sub>38</sub> | 2487.0979          | 2487.0928          | -2.05 |
| 4  | H-YGGSRGKRNNFK(Dau=Aoa)TE-OH      | C <sub>97</sub> H <sub>138</sub> N <sub>26</sub> O <sub>33</sub>  | 2194.9920          | 2194.9866          | -2.46 |
| 5  | H-YGGSRGKRNNFK(Dau=Aoa)-OH        | C <sub>88</sub> H <sub>124</sub> N <sub>24</sub> O <sub>28</sub>  | 1964.9017          | 1964.8953          | -3.26 |
| 6  | H-GKRNNFK(Dau=Aoa)-OH             | C <sub>66</sub> H <sub>92</sub> N <sub>16</sub> O <sub>21</sub>   | 1444.6623          | 1444.6582          | -2.84 |
| 7  | H-NNFK(Dau=Aoa)-OH                | C <sub>52</sub> H <sub>65</sub> N <sub>9</sub> O <sub>18</sub>    | 1103.4448          | 1103.4420          | -2.54 |
| 8  | H-K(Dau=Aoa)T-OH                  | C <sub>39</sub> H <sub>51</sub> N <sub>5</sub> O <sub>15</sub>    | 829.3382           | 829.3358           | -2.89 |
| 9  | H-K(Dau=Aoa)-OH                   | C <sub>35</sub> H <sub>44</sub> N <sub>4</sub> O <sub>13</sub>    | 728.2905           | 728.2878           | -3.71 |
| 10 | H-TFF-OH                          | C <sub>22</sub> H <sub>27</sub> N <sub>3</sub> O <sub>5</sub>     | 413.1951           | 413.1937           | -3.39 |
| 11 | H-EY-OH                           | C <sub>14</sub> H <sub>18</sub> N <sub>2</sub> O <sub>6</sub>     | 310.1165           | 310.1151           | -4.51 |
| 12 | H-TF-OH                           | C <sub>13</sub> H <sub>18</sub> N <sub>2</sub> O <sub>4</sub>     | 266.1267           | 266.1254           | -4.88 |

<sup>a</sup> The grey row indicates the smallest drug containing metabolite.

**Table S3.** Detected fragments from the lysosomal degradation of conjugate 3.<sup>a</sup>

|   | Fragment                       | Chemical formula                                                  | MW <sub>calc</sub> | MW <sub>meas</sub> | Δ ppm |
|---|--------------------------------|-------------------------------------------------------------------|--------------------|--------------------|-------|
| 1 | Dau=Aoa-TFFYGGSRGKRNNFKTEEY-OH | C <sub>133</sub> H <sub>179</sub> N <sub>31</sub> O <sub>42</sub> | 2882.2824          | 2882.2767          | -1.98 |
| 2 | Dau=Aoa-TFFYGGSRGKRNNFKTE-OH   | C <sub>119</sub> H <sub>163</sub> N <sub>29</sub> O <sub>37</sub> | 2590.1765          | 2590.1716          | -1.89 |
| 3 | Dau=Aoa-TFFYGGSRGKRNNFK-OH     | C <sub>110</sub> H <sub>149</sub> N <sub>27</sub> O <sub>32</sub> | 2360.0862          | 2360.0796          | -2.80 |
| 4 | Dau=Aoa-TFFYGGSRGKRNN-OH       | C <sub>95</sub> H <sub>128</sub> N <sub>24</sub> O <sub>30</sub>  | 2084.9228          | 2084.9196          | -1.53 |
| 5 | H-FYGGSRGKRNNFKTEEY-OH         | C <sub>91</sub> H <sub>133</sub> N <sub>27</sub> O <sub>28</sub>  | 2051.9813          | 2051.9760          | -2.58 |
| 6 | Dau=Aoa-TF-OH                  | C <sub>42</sub> H <sub>48</sub> N <sub>4</sub> O <sub>15</sub>    | 848.3116           | 848.3095           | -2.48 |
| 7 | Dau=Aoa-T-OH                   | C <sub>33</sub> H <sub>39</sub> N <sub>3</sub> O <sub>14</sub>    | 701.2432           | 701.2408           | -3.42 |
| 8 | H-FYG-OH                       | C <sub>20</sub> H <sub>23</sub> N <sub>3</sub> O <sub>5</sub>     | 385.1638           | 385.1624           | -3.63 |
| 9 | H-EY-OH                        | C <sub>14</sub> H <sub>18</sub> N <sub>2</sub> O <sub>6</sub>     | 310.1165           | 310.1152           | -4.19 |

<sup>a</sup> The grey row indicates the smallest drug containing metabolite.

**Table S4.** Detected fragments from the lysosomal degradation of conjugate 4.<sup>a</sup>

|    | Fragment                          | Chemical formula                                                  | MW <sub>calc</sub> | MW <sub>meas</sub> | Δ ppm |
|----|-----------------------------------|-------------------------------------------------------------------|--------------------|--------------------|-------|
| 1  | H-TFFYGGSRGK(Dau=Aoa)RNNFKTEEY-OH | C <sub>133</sub> H <sub>179</sub> N <sub>31</sub> O <sub>42</sub> | 2882.2824          | 2882.2764          | -2.08 |
| 2  | H-TFFYGGSRGK(Dau=Aoa)RNNFKTE-OH   | C <sub>119</sub> H <sub>163</sub> N <sub>29</sub> O <sub>37</sub> | 2590.1765          | 2590.1694          | -2.74 |
| 3  | H-YGGSRGK(Dau=Aoa)RNNFKTEEY-OH    | C <sub>111</sub> H <sub>154</sub> N <sub>28</sub> O <sub>38</sub> | 2487.0979          | 2487.0903          | -3.06 |
| 4  | H-TFFYGGSRGK(Dau=Aoa)RNNFK-OH     | C <sub>110</sub> H <sub>149</sub> N <sub>27</sub> O <sub>32</sub> | 2360.0862          | 2360.0793          | -2.92 |
| 5  | H-GSRGK(Dau=Aoa)RNNFKTEEY-OH      | C <sub>100</sub> H <sub>142</sub> N <sub>26</sub> O <sub>35</sub> | 2267.0131          | 2267.0070          | -2.69 |
| 6  | H-YGGSRGK(Dau=Aoa)RNNFKTE-OH      | C <sub>97</sub> H <sub>138</sub> N <sub>26</sub> O <sub>33</sub>  | 2194.9920          | 2194.9876          | -2.00 |
| 7  | H-YGGSRGK(Dau=Aoa)RNNFK-OH        | C <sub>88</sub> H <sub>124</sub> N <sub>24</sub> O <sub>28</sub>  | 1964.9017          | 1964.8970          | -2.39 |
| 8  | H-GSRGK(Dau=Aoa)RNNFK-OH          | C <sub>77</sub> H <sub>112</sub> N <sub>22</sub> O <sub>25</sub>  | 1744.8169          | 1744.8122          | -2.69 |
| 9  | H-GK(Dau=Aoa)RN-OH                | C <sub>47</sub> H <sub>65</sub> N <sub>11</sub> O <sub>17</sub>   | 1055.4560          | 1055.4530          | -2.84 |
| 10 | H-GK(Dau=Aoa)R-OH                 | C <sub>43</sub> H <sub>59</sub> N <sub>9</sub> O <sub>15</sub>    | 941.4131           | 941.4102           | -3.08 |
| 11 | H-GK(Dau=Aoa)-OH                  | C <sub>37</sub> H <sub>47</sub> N <sub>5</sub> O <sub>14</sub>    | 785.3120           | 785.3096           | -3.06 |
| 12 | H-K(Dau=Aoa)-OH                   | C <sub>35</sub> H <sub>44</sub> N <sub>4</sub> O <sub>13</sub>    | 728.2905           | 728.2887           | -2.47 |
| 13 | H-TFF-OH                          | C <sub>22</sub> H <sub>27</sub> N <sub>3</sub> O <sub>5</sub>     | 413.1951           | 413.1937           | -3.39 |
| 14 | H-EY-OH                           | C <sub>14</sub> H <sub>18</sub> N <sub>2</sub> O <sub>6</sub>     | 310.1165           | 310.1152           | -4.19 |
| 15 | H-TF-OH                           | C <sub>13</sub> H <sub>18</sub> N <sub>2</sub> O <sub>4</sub>     | 266.1267           | 266.1255           | -4.51 |

<sup>a</sup> The grey row indicates the smallest drug containing metabolite.

**Table S5.** Detected fragments from the lysosomal degradation of conjugate **5**.<sup>a</sup>

|           | Fragment                                | Chemical formula                                                  | MW <sub>calc</sub> | MW <sub>meas</sub> | Δ ppm |
|-----------|-----------------------------------------|-------------------------------------------------------------------|--------------------|--------------------|-------|
| <b>1</b>  | Dau=Aoa-TFFYGGSRGKRNNFK(Dau=Aoa)TEEY-OH | C <sub>162</sub> H <sub>209</sub> N <sub>33</sub> O <sub>53</sub> | 3464.4673          | 3464.4582          | -2.63 |
| <b>2</b>  | H-YGGSRGKRNNFK(Dau=Aoa)-OH              | C <sub>88</sub> H <sub>124</sub> N <sub>24</sub> O <sub>28</sub>  | 1964.9017          | 1964.8962          | -2.80 |
| <b>3</b>  | H-GSRGKRNNFK(Dau=Aoa)-OH                | C <sub>77</sub> H <sub>112</sub> N <sub>22</sub> O <sub>25</sub>  | 1744.8169          | 1744.8106          | -3.61 |
| <b>4</b>  | H-GKRNNFK(Dau=Aoa)-OH                   | C <sub>66</sub> H <sub>92</sub> N <sub>16</sub> O <sub>21</sub>   | 1444.6623          | 1444.6576          | -3.25 |
| <b>5</b>  | H-NNFK(Dau=Aoa)-OH                      | C <sub>52</sub> H <sub>65</sub> N <sub>9</sub> O <sub>18</sub>    | 1103.4448          | 1103.4419          | -2.63 |
| <b>6</b>  | Dau=Aoa-TF-OH                           | C <sub>42</sub> H <sub>48</sub> N <sub>4</sub> O <sub>15</sub>    | 848.3116           | 848.3092           | -2.83 |
| <b>7</b>  | H-K(Dau=Aoa)T-OH                        | C <sub>39</sub> H <sub>51</sub> N <sub>5</sub> O <sub>15</sub>    | 829.3382           | 829.3361           | -2.53 |
| <b>8</b>  | H-K(Dau=Aoa)-OH                         | C <sub>35</sub> H <sub>44</sub> N <sub>4</sub> O <sub>13</sub>    | 728.2905           | 728.2876           | -3.98 |
| <b>9</b>  | Dau=Aoa-T-OH                            | C <sub>33</sub> H <sub>39</sub> N <sub>3</sub> O <sub>14</sub>    | 701.2432           | 701.2411           | -2.99 |
| <b>10</b> | H-FYG-OH                                | C <sub>20</sub> H <sub>23</sub> N <sub>3</sub> O <sub>5</sub>     | 385.1638           | 385.1623           | -3.89 |
| <b>11</b> | H-EY-OH                                 | C <sub>14</sub> H <sub>18</sub> N <sub>2</sub> O <sub>6</sub>     | 310.1165           | 310.1151           | -4.51 |

<sup>a</sup> The grey rows indicate the smallest drug containing metabolites.

**Table S6.** Detected fragments from the lysosomal degradation of conjugate **6**.<sup>a</sup>

|    | Fragment                                   | Chemical formula                                                  | MW <sub>calc</sub> | MW <sub>meas</sub> | Δ ppm |
|----|--------------------------------------------|-------------------------------------------------------------------|--------------------|--------------------|-------|
| 1  | H-TFFYGGSRGK(Dau=Aoa)RNNFK(Dau=Aoa)TEEY-OH | C <sub>162</sub> H <sub>209</sub> N <sub>33</sub> O <sub>53</sub> | 3464.4673          | 3464.4564          | -3.15 |
| 2  | H-YGGSRGK(Dau=Aoa)RNNFK(Dau=Aoa)TEEY-OH    | C <sub>140</sub> H <sub>184</sub> N <sub>30</sub> O <sub>49</sub> | 3069.2828          | 3069.2739          | -2.90 |
| 3  | H-YGGSRGK(Dau=Aoa)RNNFK(Dau=Aoa)TE-OH      | C <sub>126</sub> H <sub>168</sub> N <sub>28</sub> O <sub>44</sub> | 2777.1769          | 2777.1666          | -3.71 |
| 4  | H-GSRGK(Dau=Aoa)RNNFK(Dau=Aoa)-OH          | C <sub>106</sub> H <sub>142</sub> N <sub>24</sub> O <sub>36</sub> | 2327.0019          | 2326.9952          | -2.88 |
| 5  | H-GSRGK(Dau=Aoa)RNN-OH                     | C <sub>62</sub> H <sub>91</sub> N <sub>19</sub> O <sub>23</sub>   | 1469.6535          | 1469.6480          | -3.74 |
| 6  | H-GSRGK(Dau=Aoa)RN-OH                      | C <sub>58</sub> H <sub>85</sub> N <sub>17</sub> O <sub>21</sub>   | 1355.6106          | 1355.6060          | -3.39 |
| 7  | H-GSRGK(Dau=Aoa)R-OH                       | C <sub>54</sub> H <sub>79</sub> N <sub>15</sub> O <sub>19</sub>   | 1241.5677          | 1241.5640          | -2.98 |
| 8  | H-NNFK(Dau=Aoa)-OH                         | C <sub>52</sub> H <sub>65</sub> N <sub>9</sub> O <sub>18</sub>    | 1103.4447          | 1103.4414          | -2.99 |
| 9  | H-GK(Dau=Aoa)RN-OH                         | C <sub>47</sub> H <sub>65</sub> N <sub>11</sub> O <sub>17</sub>   | 1055.4560          | 1055.4522          | -3.60 |
| 10 | H-NFK(Dau=Aoa)-OH                          | C <sub>48</sub> H <sub>59</sub> N <sub>7</sub> O <sub>16</sub>    | 989.4018           | 989.3988           | -3.03 |
| 11 | H-GK(Dau=Aoa)R-OH                          | C <sub>43</sub> H <sub>59</sub> N <sub>9</sub> O <sub>15</sub>    | 941.4131           | 941.4094           | -3.93 |
| 12 | H-GK(Dau=Aoa)-OH                           | C <sub>37</sub> H <sub>47</sub> N <sub>5</sub> O <sub>14</sub>    | 785.3120           | 785.3088           | -4.07 |
| 13 | H-K(Dau=Aoa)-OH                            | C <sub>35</sub> H <sub>44</sub> N <sub>4</sub> O <sub>13</sub>    | 728.2905           | 728.2880           | -3.43 |
| 14 | H-TFF-OH                                   | C <sub>22</sub> H <sub>27</sub> N <sub>3</sub> O <sub>5</sub>     | 413.1951           | 413.1930           | -5.08 |
| 15 | H-EY-OH                                    | C <sub>14</sub> H <sub>18</sub> N <sub>2</sub> O <sub>6</sub>     | 310.1165           | 310.1149           | -5.16 |
| 16 | H-TF-OH                                    | C <sub>13</sub> H <sub>18</sub> N <sub>2</sub> O <sub>4</sub>     | 266.1267           | 266.1253           | -5.26 |

<sup>a</sup> The grey row indicates the smallest drug containing metabolite.

**Table S7.** Detected fragments from the lysosomal degradation of conjugate 7.<sup>a</sup>

|    | Fragment                                | Chemical formula                                                  | MW <sub>calc</sub> | MW <sub>meas</sub> | Δ ppm |
|----|-----------------------------------------|-------------------------------------------------------------------|--------------------|--------------------|-------|
| 1  | Dau=Aoa-TFFYGGSRGK(Dau=Aoa)RNNFKTEEY-OH | C <sub>162</sub> H <sub>209</sub> N <sub>33</sub> O <sub>53</sub> | 3464.4673          | 3464.4546          | -3.67 |
| 2  | Dau=Aoa-TFFYGGSRGK(Dau=Aoa)RNNFKTE-OH   | C <sub>148</sub> H <sub>193</sub> N <sub>31</sub> O <sub>48</sub> | 3172.3614          | 3172.3488          | -3.97 |
| 3  | Dau=Aoa-TFFYGGSRGK(Dau=Aoa)RNNFK-OH     | C <sub>139</sub> H <sub>179</sub> N <sub>29</sub> O <sub>43</sub> | 2942.2712          | 2942.2614          | -3.33 |
| 4  | H-GSRGK(Dau=Aoa)RNNFK-OH                | C <sub>77</sub> H <sub>112</sub> N <sub>22</sub> O <sub>25</sub>  | 1744.8169          | 1744.8093          | -4.36 |
| 5  | H-GSRGK(Dau=Aoa)RNN-OH                  | C <sub>62</sub> H <sub>91</sub> N <sub>19</sub> O <sub>23</sub>   | 1469.6535          | 1469.6476          | -4.01 |
| 6  | H-GK(Dau=Aoa)RNNFK-OH                   | C <sub>66</sub> H <sub>92</sub> N <sub>16</sub> O <sub>21</sub>   | 1444.6623          | 1444.6576          | -3.25 |
| 7  | H-GSRGK(Dau=Aoa)RN-OH                   | C <sub>58</sub> H <sub>85</sub> N <sub>17</sub> O <sub>21</sub>   | 1355.6106          | 1355.6052          | -3.98 |
| 8  | H-GSRGK(Dau=Aoa)R-OH                    | C <sub>54</sub> H <sub>79</sub> N <sub>15</sub> O <sub>19</sub>   | 1241.5677          | 1241.5628          | -3.95 |
| 9  | H-GK(Dau=Aoa)RN-OH                      | C <sub>47</sub> H <sub>65</sub> N <sub>11</sub> O <sub>17</sub>   | 1055.4560          | 1055.4522          | -3.60 |
| 10 | H-GK(Dau=Aoa)R-OH                       | C <sub>43</sub> H <sub>59</sub> N <sub>9</sub> O <sub>15</sub>    | 941.4131           | 941.4101           | -3.19 |
| 11 | H-GK(Dau=Aoa)-OH                        | C <sub>37</sub> H <sub>47</sub> N <sub>5</sub> O <sub>14</sub>    | 785.3120           | 785.3090           | -3.82 |
| 12 | Dau=Aoa-TF-OH                           | C <sub>42</sub> H <sub>48</sub> N <sub>4</sub> O <sub>15</sub>    | 848.3116           | 848.3084           | -3.77 |
| 13 | H-K(Dau=Aoa)-OH                         | C <sub>35</sub> H <sub>44</sub> N <sub>4</sub> O <sub>13</sub>    | 728.2905           | 728.2880           | -3.43 |
| 14 | Dau=Aoa-T-OH                            | C <sub>33</sub> H <sub>39</sub> N <sub>3</sub> O <sub>14</sub>    | 701.2432           | 701.2402           | -4.28 |
| 15 | H-FYG-OH                                | C <sub>20</sub> H <sub>23</sub> N <sub>3</sub> O <sub>5</sub>     | 385.1638           | 385.1619           | -4.93 |
| 16 | H-EY-OH                                 | C <sub>14</sub> H <sub>18</sub> N <sub>2</sub> O <sub>6</sub>     | 310.1165           | 310.1148           | -5.48 |

<sup>a</sup> The grey rows indicate the smallest drug containing metabolites.



**Table S8.** Detected fragments from the lysosomal degradation of conjugate 8.<sup>a</sup>

|    | Fragment                                         | Chemical formula                                                  | MW <sub>calc</sub> | MW <sub>meas</sub> | Δ ppm |
|----|--------------------------------------------------|-------------------------------------------------------------------|--------------------|--------------------|-------|
| 1  | Dau=Aoa-TFFYGGSRGK(Dau=Aoa)RNNFK(Dau=Aoa)TEEY-OH | C <sub>191</sub> H <sub>239</sub> N <sub>35</sub> O <sub>64</sub> | 4046.6523          | 4046.6460          | -1.56 |
| 2  | H-GSRGK(Dau=Aoa)RNNFK(Dau=Aoa)-OH                | C <sub>106</sub> H <sub>142</sub> N <sub>24</sub> O <sub>36</sub> | 2327.0019          | 2326.9950          | -2.97 |
| 3  | H-GSRGK(Dau=Aoa)RNN-OH                           | C <sub>62</sub> H <sub>91</sub> N <sub>19</sub> O <sub>23</sub>   | 1469.6535          | 1469.6478          | -3.88 |
| 4  | H-GSRGK(Dau=Aoa)RN-OH                            | C <sub>58</sub> H <sub>85</sub> N <sub>17</sub> O <sub>21</sub>   | 1355.6106          | 1355.6058          | -3.54 |
| 5  | H-GSRGK(Dau=Aoa)R-OH                             | C <sub>54</sub> H <sub>79</sub> N <sub>15</sub> O <sub>19</sub>   | 1241.5677          | 1241.5634          | -3.46 |
| 6  | H-NNFK(Dau=Aoa)-OH                               | C <sub>52</sub> H <sub>65</sub> N <sub>9</sub> O <sub>18</sub>    | 1103.4447          | 1103.4409          | -3.44 |
| 7  | H-NFK(Dau=Aoa)-OH                                | C <sub>48</sub> H <sub>59</sub> N <sub>7</sub> O <sub>16</sub>    | 989.4018           | 989.3984           | -3.44 |
| 8  | H-GK(Dau=Aoa)R-OH                                | C <sub>43</sub> H <sub>59</sub> N <sub>9</sub> O <sub>15</sub>    | 941.4131           | 941.4094           | -3.93 |
| 9  | Dau=Aoa-TF-OH                                    | C <sub>42</sub> H <sub>48</sub> N <sub>4</sub> O <sub>15</sub>    | 848.3116           | 848.3082           | -4.01 |
| 10 | H-GK(Dau=Aoa)-OH                                 | C <sub>37</sub> H <sub>47</sub> N <sub>5</sub> O <sub>14</sub>    | 785.3120           | 785.3090           | -3.82 |
| 11 | H-K(Dau=Aoa)-OH                                  | C <sub>35</sub> H <sub>44</sub> N <sub>4</sub> O <sub>13</sub>    | 728.2905           | 728.2877           | -3.84 |
| 12 | Dau=Aoa-T-OH                                     | C <sub>33</sub> H <sub>39</sub> N <sub>3</sub> O <sub>14</sub>    | 701.2432           | 701.2401           | -4.42 |
| 13 | H-FYG-OH                                         | C <sub>20</sub> H <sub>23</sub> N <sub>3</sub> O <sub>5</sub>     | 385.1638           | 385.1619           | -4.93 |
| 14 | H-EY-OH                                          | C <sub>14</sub> H <sub>18</sub> N <sub>2</sub> O <sub>6</sub>     | 310.1165           | 310.1149           | -5.16 |

<sup>a</sup> The grey rows indicate the smallest drug containing metabolites.

**Table S9.** Analytical data of the enzyme labile spacer containing Angiopep-2 – daunomycin conjugates

| Code | Conjugate                              | $R_t$ / min <sup>a</sup> | $MW_{calc}$ / $MW_{meas}$ <sup>b</sup> |
|------|----------------------------------------|--------------------------|----------------------------------------|
| 9    | H-TFFYGGSRGK(Dau=Aoa-GFLG)RNNFKTEEY-OH | 22.3                     | 3256.5 / 3256.5                        |
| 10   | H-TFFYGGSRGK(Dau=Aoa-VA)RNNFKTEEY-OH   | 21.5                     | 3052.4 / 3052.4                        |
| 11   | H-TFFYGGSRGK(Dau=Aoa-VAGG)RNNFKTEEY-OH | 21.5                     | 3166.4 / 3166.4                        |

<sup>a</sup> Macherey-Nagel Nucleosil C18 column (5  $\mu$ m, 100 Å, 250  $\times$  4,6 mm); gradient: 0 min 2% B, 5 min 2% B, 30 min 90% B; eluent A: 0.1% TFA / distilled water, eluent B: 0.1% TFA / acetonitrile:distilled water (80:20, v/v); flow rate: 1 mL/min; detection: 214 nm.

<sup>b</sup> ESI-MS Bruker Daltonics Esquire 3000 Plus

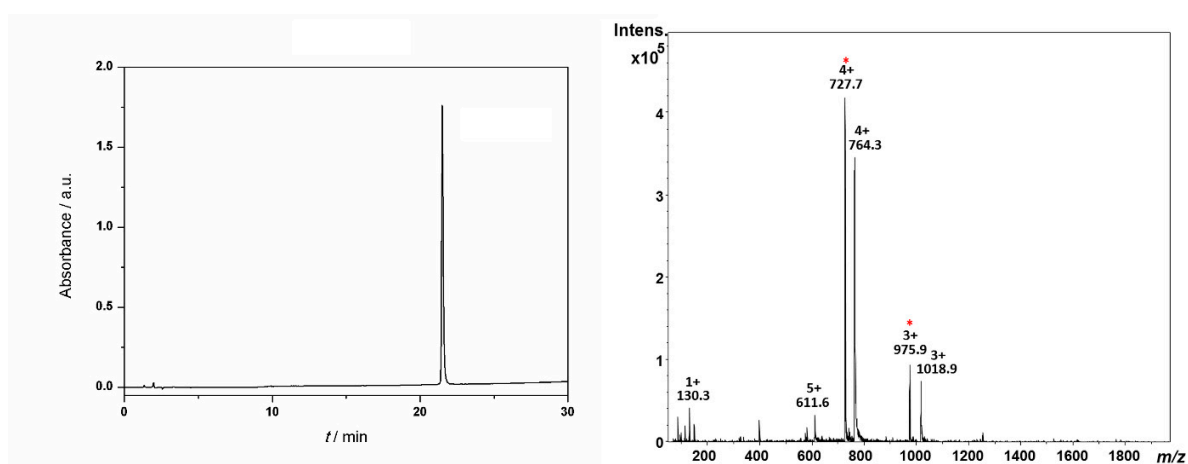

**Figure S16.** Analytical chromatogram and MS spectrum of H-TFFYGGSRGK(Dau=Aoa-GFLG)RNNFKTEEY-OH (9). Peaks marked with \* belong to the fragments resulting from the sugar loss of daunomycin occurring under general conditions of MS.

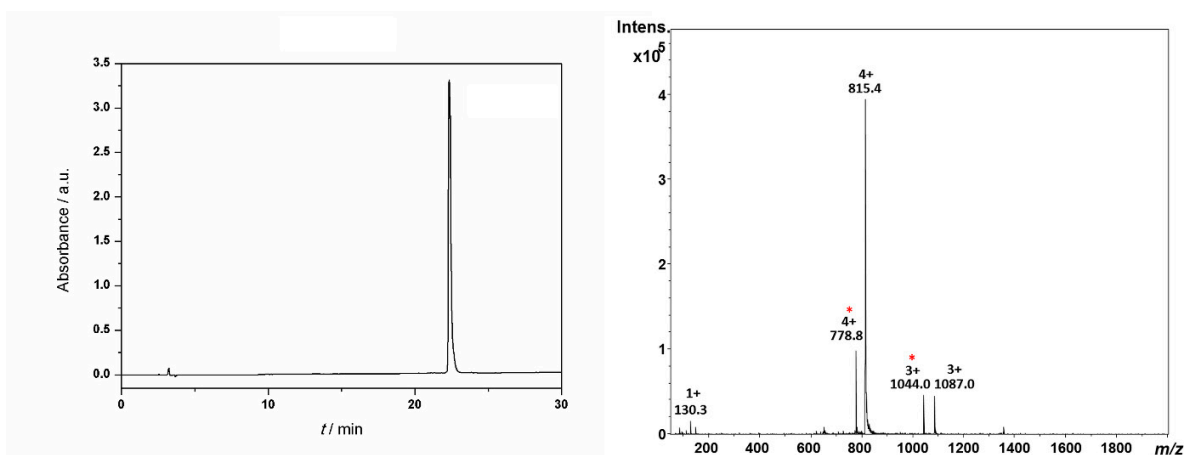

**Figure S17.** Analytical chromatogram and MS spectrum of H-TFFYGGSRGK(Dau=Aoa-VA)RNNFKTEEY-OH (**10**). Peaks marked with \* belong to the fragments resulting from the sugar loss of daunomycin occurring under general conditions of MS.

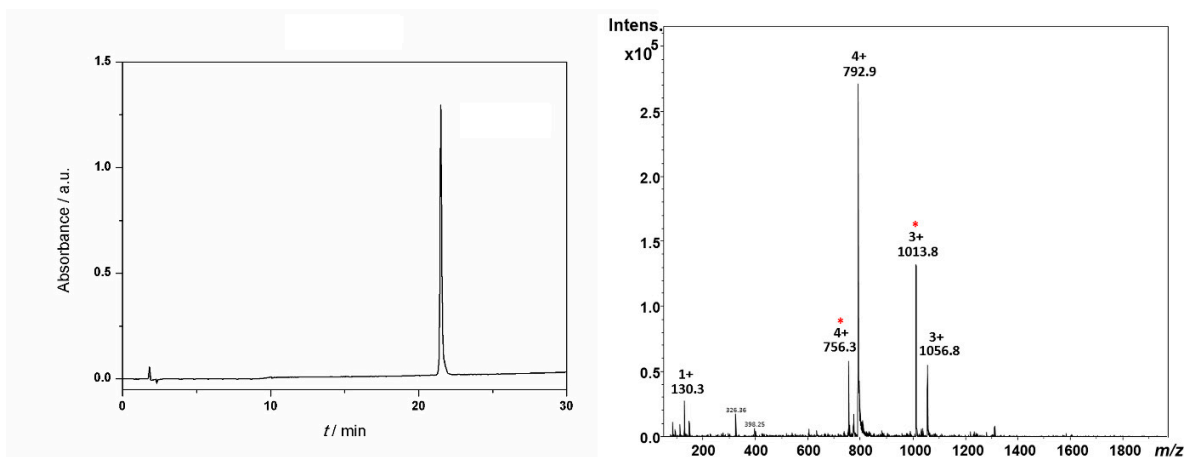

**Figure S18.** Analytical chromatogram and MS spectrum of H-TFFYGGSRGK(Dau=Aoa-VAGG)RNNFKTEEY-OH (**11**). Peaks marked with \* belong to the fragments resulting from the sugar loss of daunomycin occurring under general conditions of MS.

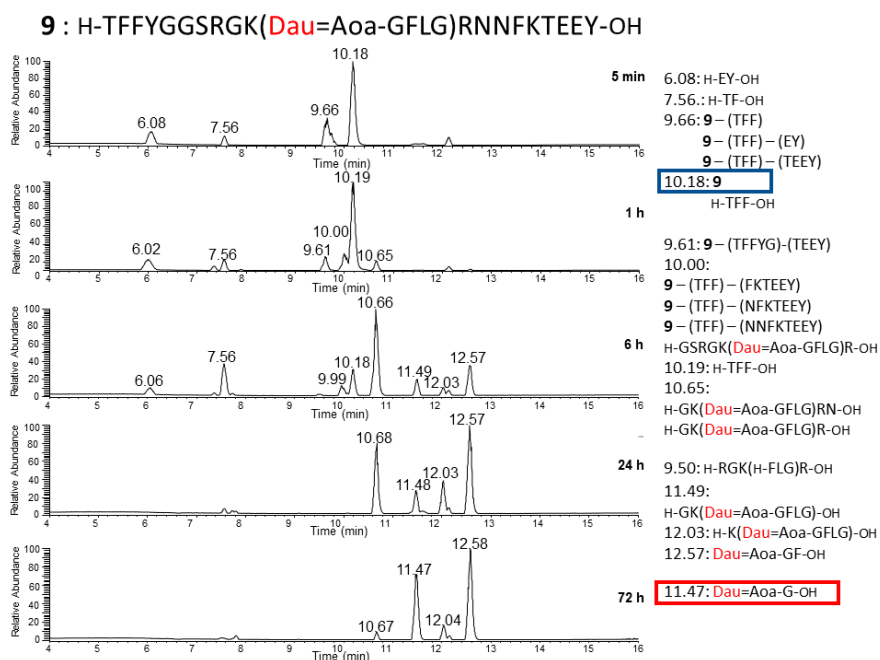

**Figure S19.** Detected total ion chromatograms showing the lysosomal degradation of conjugate **9**. (The blue box indicates the parent conjugate, while the red box marks the smallest drug containing metabolite.)

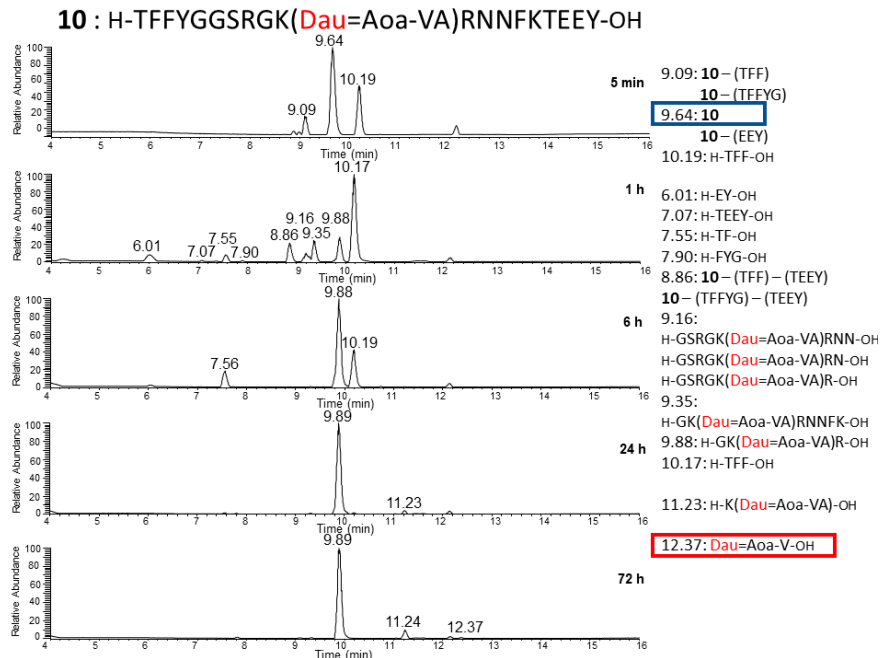

**Figure S20.** Detected total ion chromatograms showing the lysosomal degradation of conjugate **10**. (The blue box indicates the parent conjugate, while the red box marks the smallest drug containing metabolite.)

**11 : H-TFFYGGSRGK(Dau=Aoa-VAGG)RNNFKTEEY-OH**

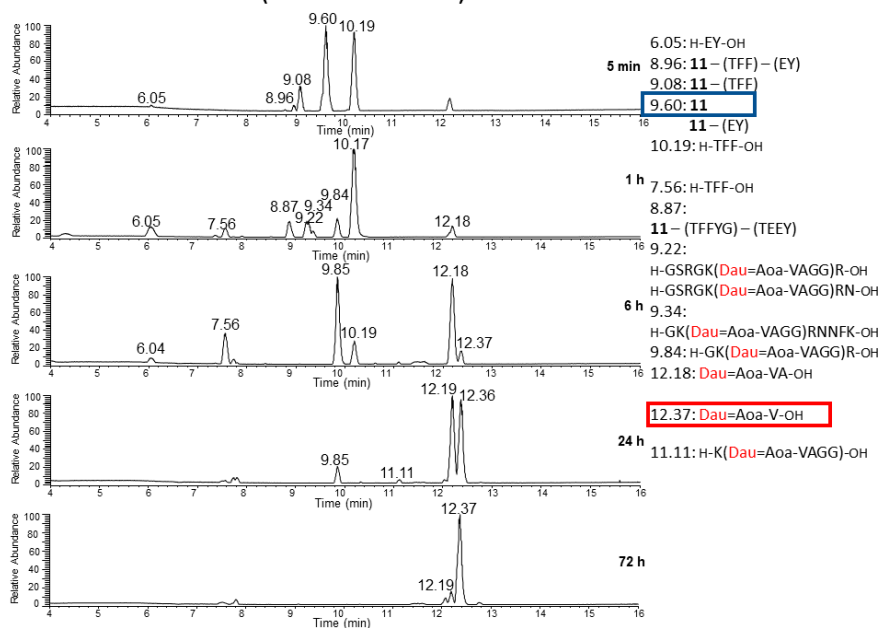

**Figure S21.** Detected total ion chromatograms showing the lysosomal degradation of conjugate **11**. (The blue box indicates the parent conjugate, while the red box marks the smallest drug containing metabolite.)

**Table S10.** Detected fragments from the lysosomal degradation of conjugate **9**.<sup>a</sup>

|           | Fragment                                        | Chemical formula                                                  | MW <sub>calc</sub> | MW <sub>meas</sub> | Δ ppm |
|-----------|-------------------------------------------------|-------------------------------------------------------------------|--------------------|--------------------|-------|
| <b>1</b>  | H-TFFYGGSRGK( <b>Dau</b> =Aoa-GFLG)RNNFKTEEY-OH | C <sub>152</sub> H <sub>205</sub> N <sub>35</sub> O <sub>46</sub> | 3256.4778          | 3256.4668          | -3.38 |
| <b>2</b>  | H-YGGSRGK( <b>Dau</b> =Aoa-GFLG)RNNFKTEEY-OH    | C <sub>130</sub> H <sub>180</sub> N <sub>32</sub> O <sub>42</sub> | 2861.2933          | 2861.2815          | -4.12 |
| <b>3</b>  | H-YGGSRGK( <b>Dau</b> =Aoa-GFLG)RNNFKTE-OH      | C <sub>116</sub> H <sub>164</sub> N <sub>30</sub> O <sub>37</sub> | 2569.1874          | 2569.1775          | -3.85 |
| <b>4</b>  | H-YGGSRGK( <b>Dau</b> =Aoa-GFLG)RNNFK-OH        | C <sub>107</sub> H <sub>150</sub> N <sub>28</sub> O <sub>32</sub> | 2339.0971          | 2339.0868          | -4.40 |
| <b>5</b>  | H-GSRGK( <b>Dau</b> =Aoa-GFLG)RNNFK-OH          | C <sub>96</sub> H <sub>138</sub> N <sub>26</sub> O <sub>29</sub>  | 2119.0123          | 2119.0026          | -4.58 |
| <b>6</b>  | H-YGGSRGK( <b>Dau</b> =Aoa-GFLG)RNN-OH          | C <sub>92</sub> H <sub>129</sub> N <sub>25</sub> O <sub>30</sub>  | 2063.9337          | 2063.9258          | -3.83 |
| <b>7</b>  | H-YGGSRGK( <b>Dau</b> =Aoa-GFLG)RN-OH           | C <sub>88</sub> H <sub>123</sub> N <sub>23</sub> O <sub>28</sub>  | 1949.8908          | 1949.8828          | -4.10 |
| <b>8</b>  | H-YGGSRGK( <b>Dau</b> =Aoa-GFLG)R-OH            | C <sub>84</sub> H <sub>117</sub> N <sub>21</sub> O <sub>26</sub>  | 1835.8479          | 1835.8404          | -4.09 |
| <b>9</b>  | H-GGSRGK( <b>Dau</b> =Aoa-GFLG)RN-OH            | C <sub>79</sub> H <sub>114</sub> N <sub>22</sub> O <sub>26</sub>  | 1786.8275          | 1786.8196          | -4.42 |
| <b>10</b> | H-GGSRGK( <b>Dau</b> =Aoa-GFLG)R-OH             | C <sub>75</sub> H <sub>108</sub> N <sub>20</sub> O <sub>24</sub>  | 1672.7845          | 1672.7776          | -4.12 |
| <b>11</b> | H-GSRGK( <b>Dau</b> =Aoa-GFLG)R-OH              | C <sub>73</sub> H <sub>105</sub> N <sub>19</sub> O <sub>23</sub>  | 1615.7631          | 1615.7556          | -4.64 |
| <b>12</b> | H-GK( <b>Dau</b> =Aoa-GFLG)RN-OH                | C <sub>66</sub> H <sub>91</sub> N <sub>15</sub> O <sub>21</sub>   | 1429.6514          | 1429.6454          | -4.20 |
| <b>13</b> | H-GK( <b>Dau</b> =Aoa-GFLG)R-OH                 | C <sub>62</sub> H <sub>85</sub> N <sub>13</sub> O <sub>19</sub>   | 1315.6085          | 1315.6038          | -3.57 |
| <b>14</b> | H-GK( <b>Dau</b> =Aoa-GFLG)-OH                  | C <sub>56</sub> H <sub>73</sub> N <sub>9</sub> O <sub>18</sub>    | 1159.5074          | 1159.5041          | -2.85 |
| <b>15</b> | H-K( <b>Dau</b> =Aoa-GFLG)-OH                   | C <sub>54</sub> H <sub>70</sub> N <sub>8</sub> O <sub>17</sub>    | 1102.4859          | 1102.4827          | -2.90 |
| <b>16</b> | <b>Dau</b> =Aoa-GF-OH                           | C <sub>40</sub> H <sub>44</sub> N <sub>4</sub> O <sub>14</sub>    | 804.2854           | 804.2826           | -3.48 |
| <b>17</b> | <b>Dau</b> =Aoa-G-OH                            | C <sub>31</sub> H <sub>35</sub> N <sub>3</sub> O <sub>13</sub>    | 657.2170           | 657.2145           | -3.80 |
| <b>18</b> | H-TFF-OH                                        | C <sub>22</sub> H <sub>27</sub> N <sub>3</sub> O <sub>5</sub>     | 413.1951           | 413.1931           | -4.84 |
| <b>19</b> | H-EY-OH                                         | C <sub>14</sub> H <sub>18</sub> N <sub>2</sub> O <sub>6</sub>     | 310.1165           | 310.1148           | -5.48 |
| <b>20</b> | H-TF-OH                                         | C <sub>13</sub> H <sub>18</sub> N <sub>2</sub> O <sub>4</sub>     | 266.1267           | 266.1253           | -5.26 |

<sup>a</sup> The grey row indicates the smallest drug containing metabolite.

**Table S11.** Detected fragments from the lysosomal degradation of conjugate 10.<sup>a</sup>

|    | Fragment                             | Chemical formula                                                  | MW <sub>calc</sub> | MW <sub>meas</sub> | Δ ppm |
|----|--------------------------------------|-------------------------------------------------------------------|--------------------|--------------------|-------|
| 1  | H-TFFYGGSRGK(Dau=Aoa-VA)RNNFKTEEY-OH | C <sub>141</sub> H <sub>193</sub> N <sub>33</sub> O <sub>44</sub> | 3052.3879          | 3052.3761          | -3.87 |
| 2  | H-TFFYGGSRGK(Dau=Aoa-VA)RNNFKTE-OH   | C <sub>127</sub> H <sub>177</sub> N <sub>31</sub> O <sub>39</sub> | 2760.2820          | 2760.2706          | -4.13 |
| 3  | H-YGGSRGK(Dau=Aoa-VA)RNNFKTEEY-OH    | C <sub>119</sub> H <sub>168</sub> N <sub>30</sub> O <sub>40</sub> | 2657.2034          | 2657.1939          | -3.58 |
| 4  | H-GSRGK(Dau=Aoa-VA)RNNFKTEEY-OH      | C <sub>108</sub> H <sub>156</sub> N <sub>28</sub> O <sub>37</sub> | 2437.1186          | 2437.1088          | -4.02 |
| 5  | H-YGGSRGK(Dau=Aoa-VA)RNNFK-OH        | C <sub>96</sub> H <sub>138</sub> N <sub>26</sub> O <sub>30</sub>  | 2135.0072          | 2134.9980          | -4.31 |
| 6  | H-GSRGK(Dau=Aoa-VA)RNNFK-OH          | C <sub>85</sub> H <sub>126</sub> N <sub>24</sub> O <sub>27</sub>  | 1914.9224          | 1914.9144          | -4.18 |
| 7  | H-GSRGK(Dau=Aoa-VA)RNN-OH            | C <sub>70</sub> H <sub>105</sub> N <sub>21</sub> O <sub>25</sub>  | 1639.7590          | 1639.7522          | -4.15 |
| 8  | H-GK(Dau=Aoa-VA)RNNFK-OH             | C <sub>74</sub> H <sub>106</sub> N <sub>18</sub> O <sub>23</sub>  | 1614.7678          | 1614.7622          | -3.47 |
| 9  | H-GSRGK(Dau=Aoa-VA)RN-OH             | C <sub>66</sub> H <sub>99</sub> N <sub>19</sub> O <sub>23</sub>   | 1525.7161          | 1525.7100          | -4.00 |
| 10 | H-GSRGK(Dau=Aoa-VA)R-OH              | C <sub>62</sub> H <sub>93</sub> N <sub>17</sub> O <sub>21</sub>   | 1411.6732          | 1411.6678          | -3.83 |
| 11 | H-GK(Dau=Aoa-VA)R-OH                 | C <sub>51</sub> H <sub>73</sub> N <sub>11</sub> O <sub>17</sub>   | 1111.5186          | 1111.5147          | -3.51 |
| 12 | H-K(Dau=Aoa-VA)-OH                   | C <sub>43</sub> H <sub>58</sub> N <sub>6</sub> O <sub>15</sub>    | 898.3960           | 898.3929           | -3.45 |
| 13 | Dau=Aoa-V-OH                         | C <sub>34</sub> H <sub>41</sub> N <sub>3</sub> O <sub>13</sub>    | 699.2639           | 699.2615           | -3.43 |
| 14 | H-TEEY-OH                            | C <sub>23</sub> H <sub>32</sub> N <sub>4</sub> O <sub>11</sub>    | 540.2068           | 540.2051           | -3.15 |
| 15 | H-TFF-OH                             | C <sub>22</sub> H <sub>27</sub> N <sub>3</sub> O <sub>5</sub>     | 413.1951           | 413.1931           | -4.84 |
| 16 | H-FYG-OH                             | C <sub>20</sub> H <sub>23</sub> N <sub>3</sub> O <sub>5</sub>     | 385.1638           | 385.1624           | -3.63 |
| 17 | H-EY-OH                              | C <sub>14</sub> H <sub>18</sub> N <sub>2</sub> O <sub>6</sub>     | 310.1165           | 310.1149           | -5.16 |
| 18 | H-TF-OH                              | C <sub>13</sub> H <sub>18</sub> N <sub>2</sub> O <sub>4</sub>     | 266.1267           | 266.1253           | -5.26 |

<sup>a</sup> The grey row indicates the smallest drug containing metabolite.

**Table S12.** Detected fragments from the lysosomal degradation of conjugate **11**.<sup>a</sup>

|    | Fragment                               | Chemical formula                                                  | MW <sub>calc</sub> | MW <sub>meas</sub> | Δ ppm |
|----|----------------------------------------|-------------------------------------------------------------------|--------------------|--------------------|-------|
| 1  | H-TFFYGGSRGK(Dau=Aoa-VAGG)RNNFKTEEY-OH | C <sub>145</sub> H <sub>199</sub> N <sub>35</sub> O <sub>46</sub> | 3166.4308          | 3166.4211          | -3.06 |
| 2  | H-TFFYGGSRGK(Dau=Aoa-VAGG)RNNFKTE-OH   | C <sub>131</sub> H <sub>183</sub> N <sub>33</sub> O <sub>41</sub> | 2874.3249          | 2874.3138          | -3.86 |
| 3  | H-YGGSRGK(Dau=Aoa-VAGG)RNNFKTEEY-OH    | C <sub>123</sub> H <sub>174</sub> N <sub>32</sub> O <sub>42</sub> | 2771.2463          | 2771.2365          | -3.54 |
| 4  | H-YGGSRGK(Dau=Aoa-VAGG)RNNFKTE-OH      | C <sub>109</sub> H <sub>158</sub> N <sub>30</sub> O <sub>37</sub> | 2479.1404          | 2479.1313          | -3.67 |
| 5  | H-GSRGK(Dau=Aoa-VAGG)RNNFK-OH          | C <sub>89</sub> H <sub>132</sub> N <sub>26</sub> O <sub>29</sub>  | 2028.9654          | 2028.9580          | -3.65 |
| 6  | H-GK(Dau=Aoa-VAGG)RNNFK-OH             | C <sub>78</sub> H <sub>112</sub> N <sub>20</sub> O <sub>25</sub>  | 1728.8107          | 1728.8036          | -4.11 |
| 7  | H-GSRGK(Dau=Aoa-VAGG)RN-OH             | C <sub>70</sub> H <sub>105</sub> N <sub>21</sub> O <sub>25</sub>  | 1639.7590          | 1639.7516          | -4.51 |
| 8  | H-GSRGK(Dau=Aoa-VAGG)R-OH              | C <sub>66</sub> H <sub>99</sub> N <sub>19</sub> O <sub>23</sub>   | 1525.7161          | 1525.7096          | -4.26 |
| 9  | H-GK(Dau=Aoa-VAGG)R-OH                 | C <sub>55</sub> H <sub>79</sub> N <sub>13</sub> O <sub>19</sub>   | 1225.5615          | 1225.5562          | -4.32 |
| 10 | H-GK(Dau=Aoa-VAGG)-OH                  | C <sub>49</sub> H <sub>67</sub> N <sub>9</sub> O <sub>18</sub>    | 1069.4604          | 1069.4572          | -2.99 |
| 11 | H-K(Dau=Aoa-VAGG)-OH                   | C <sub>47</sub> H <sub>64</sub> N <sub>8</sub> O <sub>17</sub>    | 1012.4389          | 1012.4358          | -3.06 |
| 12 | Dau=Aoa-VA-OH                          | C <sub>37</sub> H <sub>46</sub> N <sub>4</sub> O <sub>14</sub>    | 770.3011           | 770.2986           | -3.25 |
| 13 | Dau=Aoa-V-OH                           | C <sub>34</sub> H <sub>41</sub> N <sub>3</sub> O <sub>13</sub>    | 699.2639           | 699.2613           | -3.72 |
| 14 | H-TFF-OH                               | C <sub>22</sub> H <sub>27</sub> N <sub>3</sub> O <sub>5</sub>     | 413.1951           | 413.1931           | -4.84 |
| 15 | H-EY-OH                                | C <sub>14</sub> H <sub>18</sub> N <sub>2</sub> O <sub>6</sub>     | 310.1165           | 310.1150           | -4.84 |
| 16 | H-TF-OH                                | C <sub>13</sub> H <sub>18</sub> N <sub>2</sub> O <sub>4</sub>     | 266.1267           | 266.1252           | -5.64 |

<sup>a</sup> The grey row indicates the smallest drug containing metabolite.
